# Supplementary material for: Bi-Objective Flexible Job-Shop Scheduling Problem Considering Energy Consumption under Stochastic Processing Times
Source: PLoS One. 2016 Dec 1;11(12):e0167427. doi: 10.1371/journal.pone.0167427 (PMC5131930; doi:10.1371/journal.pone.0167427)
Supplement: S3 Table — (DOC) [file pone.0167427.s005.doc]

Supporting Information

**Bi-objective Flexible Job-shop Scheduling Problem Considering Energy Consumption under Stochastic Processing Times**

Xin Yang1,2,*, Zhenxiang Zeng1,*, Ruidong Wang3, Xueshan Sun2

**1** School of Economics and Management, Hebei University of Technology, Tianjin, China

**2** ZhongHuan Information College Tianjin University of Technology, Tianjin, China

**3** Department of Mathematics, Tianjin University of Technology, Tianjin, China

*** Corresponding Author**

**E-mail:** [**wing.lps@163.com**](mailto:wing.lps@163.com) **(XY),** [**xzeng@hebut.edu.cn**](mailto:xzeng@hebut.edu.cn) **(ZXZ)**

The Data Required for Analysis of the bi-objective FJSP under stochastic processing times in Case Study

S3 Table. Processing time on different machines (unit: min)

|  | O11 | O12 | O13 | O14 | O15 | O16 |
| --- | --- | --- | --- | --- | --- | --- |
| Job1 | 3 | 10 | 9 | [5,4] | [3,3] | 10 |
| Job2 | 6 | [8,6] | 4 | [2,6] | 3 | [3,3] |
| Job3 | 4 | [5,7] | 7 | [5,5] | [9,11] | 1 |
| Job4 | 7 | 3 | [4,6] | 3 | [1,7] | [3,6] |
| Job5 | [6,4] | 10 | [7,9] | 8 | 5 | [4,7] |
| Job6 | [3,7] | 10 | [8,7] | 9 | 4 | [9,4] |
